# Supplementary material
Source: MDPI journal article supplement (https://www.mdpi.com/2071-1050/14/1/546)
Supplement: s1 [file s1]

## Supplementary Material

**Table S1.** Scales questionnaire developed in this study. The means and standard deviations (SD) are presented.

| <b>Connectedness to nature scale</b>                                                      |                                   |             |           |
|-------------------------------------------------------------------------------------------|-----------------------------------|-------------|-----------|
| <b>Item</b>                                                                               | <b>Source</b>                     | <b>Mean</b> | <b>SD</b> |
| I am concerned about the decline in rainfall                                              | Pelzom and Katel (2017)           | 4.97        | 0.23      |
| I am concerned about soil degradation                                                     | Pelzom and Katel (2017)           | 4.92        | 0.27      |
| I am concerned about the impact of drought on native forests                              | Own item                          | 4.94        | 0.43      |
| I am concerned about the decrease in the variety and quantity of wildlife.                | Own item                          | 4.98        | 0.15      |
| I feel the need to be out in nature                                                       | Bruegger et al. (2011)            | 4.70        | 0.68      |
| My favorite place is in nature                                                            | Bruegger et al. (2011)            | 4.57        | 0.82      |
| I am interested in plants and/or animals                                                  | Nisbet et al. (2008)              | 4.68        | 0.65      |
| I feel very connected to all living beings and the Earth                                  | Nisbet et al. (2008)              | 4.40        | 0.82      |
| I think about how my actions affect the Earth                                             | Nisbet et al. (2008)              | 4.47        | 0.82      |
| Select the option that best describes your relationship with nature.                      | Wesley Schultz (2001)             | 3.71        | 1.16      |
| Select the option that best describes your relationship with the countryside.             | Own item                          | 3.56        | 1.41      |
| Select the option that best describes your relationship with the city/urban area          | Own item                          | 3.59        | 1.13      |
| <b>Social valuation of rural livelihoods scale</b>                                        |                                   |             |           |
| <b>Item</b>                                                                               | <b>Source</b>                     | <b>Mean</b> | <b>SD</b> |
| My relatives are teaching me or have taught me about farming activities.                  | Pelzom and Katel (2017)           | 4.64        | 0.63      |
| My relatives want me to work in farming activities in the future.                         | Pelzom and Katel (2017)           | 2.39        | 1.32      |
| My relatives tell me that work in the countryside has few opportunities and is hard work. | Pelzom and Katel (2017)           | 1.89        | 1.31      |
| My relatives say that farming makes them happy.                                           | Own item                          | 3.81        | 1.28      |
| My friends consider working in the countryside an excellent option for their future.      | Pelzom and Katel (2017)           | 2.15        | 1.10      |
| ...it is very important for me to live close to my relatives                              | Kirkpatrick Johnson et al. (2005) | 4.47        | 0.88      |
| ...my friends want to stay and live in the countryside                                    | Own item                          | 3.75        | 1.08      |
| ...my friends will consider me successful if I have a job in the city                     | Own item                          | 2.34        | 1.15      |
| My best friends live within my community                                                  | Own item                          | 4.44        | 1.09      |
| I feel a part of the community                                                            | Own item                          | 4.36        | 1.11      |
| I am proud of my parents and peasant ancestors                                            | Own item                          | 4.91        | 0.49      |
| My parents and farming ancestors are very wise and knowledgeable people                   | Own item                          | 4.79        | 0.64      |

| <b>Interest in living in the countryside scale</b>                                             |               |             |           |
|------------------------------------------------------------------------------------------------|---------------|-------------|-----------|
| <b>Item</b>                                                                                    | <b>Source</b> | <b>Mean</b> | <b>SD</b> |
| ...I would like to work in farming activities                                                  | Own item      | 3.30        | 1.24      |
| ...I would like my job to be in the countryside (tourism, health, education or other services) | Own item      | 3.97        | 1.18      |
| ...I can imagine myself living in the countryside when I am 30 years old                       | Own item      | 4.11        | 1.14      |
| It is an option for me to work in activities related to farming                                | Own item      | 3.19        | 1.28      |

  

| <b>Community satisfaction scale</b>                              |                           |             |           |
|------------------------------------------------------------------|---------------------------|-------------|-----------|
| <b>Item</b>                                                      | <b>Source</b>             | <b>Mean</b> | <b>SD</b> |
| I am very interested in the rural lifestyle                      | Bednaříková et al. (2016) | 4.25        | 0.96      |
| I am currently very satisfied with my life in a rural area       | Bednaříková et al. (2016) | 4.56        | 0.77      |
| I feel very satisfied living in a community                      | Kearney (2006)            | 4.68        | 0.64      |
| I am very satisfied with the security of the place where I live  | Kearney (2006)            | 4.42        | 0.95      |
| I think my house is too small                                    | Kearney (2006)            | 3.59        | 1.40      |
| I think it is bad to have no drinking water at home              | Own item                  | 1.74        | 1.33      |
| I am happy to spend time with people from my community           | Kearney (2006)            | 4.62        | 0.67      |
| I think that working in the countryside requires too much effort | Own item                  | 1.51        | 0.83      |

**Table S2.** Socioeconomic and cultural characteristics of respondents.

| <b>Age range</b>                                 | <b>Mean</b> | <b>SD</b> |
|--------------------------------------------------|-------------|-----------|
| 13-24                                            | 18          | 3.2       |
| <b>Gender</b>                                    | <b>N</b>    | <b>%</b>  |
| Female                                           | 45          | 50%       |
| Male                                             | 45          | 50%       |
| Other                                            | 0           | 0%        |
| Total                                            | 90          | 100%      |
| <b>Educational level</b>                         | <b>N</b>    | <b>%</b>  |
| Complete primary school                          | 4           | 4.4%      |
| Primary school student                           | 8           | 8.9%      |
| Secondary school student                         | 24          | 26.7%     |
| Complete secondary school (technical)            | 14          | 15.6%     |
| Incomplete secondary school                      | 12          | 13.3%     |
| Higher education student                         | 23          | 25.6%     |
| Incomplete professional technical level          | 2           | 2.2%      |
| Technical professional                           | 3           | 3.3%      |
| Total                                            | 90          | 100%      |
| <b>Higher education career</b>                   | <b>N</b>    | <b>%</b>  |
| Careers in health                                | 8           | 28.6%     |
| Social work                                      | 4           | 14.3%     |
| Careers in education                             | 4           | 14.3%     |
| Engineering                                      | 3           | 10.7%     |
| Design                                           | 1           | 3.6%      |
| Audit                                            | 2           | 7.1%      |
| Business Administration                          | 1           | 3.6%      |
| Architecture                                     | 2           | 7.1%      |
| Personal Trainer                                 | 1           | 3.6%      |
| Construction                                     | 1           | 3.6%      |
| Gastronomy                                       | 1           | 3.6%      |
| Total                                            | 28          | 100%      |
| <b>Place of study</b>                            | <b>N</b>    | <b>%</b>  |
| Within the territory of the community            | 16          | 17.8%     |
| Another place in the Municipality                | 36          | 40%       |
| In another Municipality in the Valparaíso region | 35          | 38.9%     |
| In another region                                | 3           | 3.3%      |
| Total                                            | 90          | 100%      |
| <b>Parental education level</b>                  | <b>N</b>    | <b>%</b>  |

|                             |    |       |
|-----------------------------|----|-------|
| Incomplete primary school   | 11 | 12.2% |
| Complete primary school     | 25 | 27.8% |
| Incomplete secondary school | 10 | 11.1% |
| Complete secondary school   | 27 | 30%   |
| Complete higher education   | 5  | 5.6%  |
| Incomplete higher school    | 3  | 3.3%  |
| Do not know/ not answer     | 9  | 10%   |
| Total                       | 90 | 100%  |

| <b>Economic areas of family</b> | <b>N</b> | <b>%</b> |
|---------------------------------|----------|----------|
| Others: Manufacturing           | 6        | 6.7%     |
| Others: Services                | 13       | 14.4%    |
| Farming                         | 46       | 51.1%    |
| Handicrafts                     | 16       | 17.8%    |
| Livestock                       | 9        | 10%      |
| Textile production              | 33       | 36.7%    |
| Does not respond                | 2        | 2.2%     |

| <b>Have you lived outside your community?</b> | <b>N</b> | <b>%</b> |
|-----------------------------------------------|----------|----------|
| Yes                                           | 27       | 30%      |
| No                                            | 63       | 70%      |
| Total                                         | 90       | 100%     |

| <b>Activities related to field work carried out by young people</b> | <b>N</b> | <b>%</b> |
|---------------------------------------------------------------------|----------|----------|
| Feed or care for animals                                            | 67       | 79.8%    |
| Harvest                                                             | 52       | 61.2%    |
| Soil preparation and planting                                       | 46       | 54.8%    |
| Sale                                                                | 39       | 47%      |
| Product processing (jams, liqueurs, spinning, etc.)                 | 28       | 34.6%    |
| Other activities                                                    | 35       | 38.9%    |

**Figure S1.** Main drivers of depopulation of rural areas according to the pull -push approach.

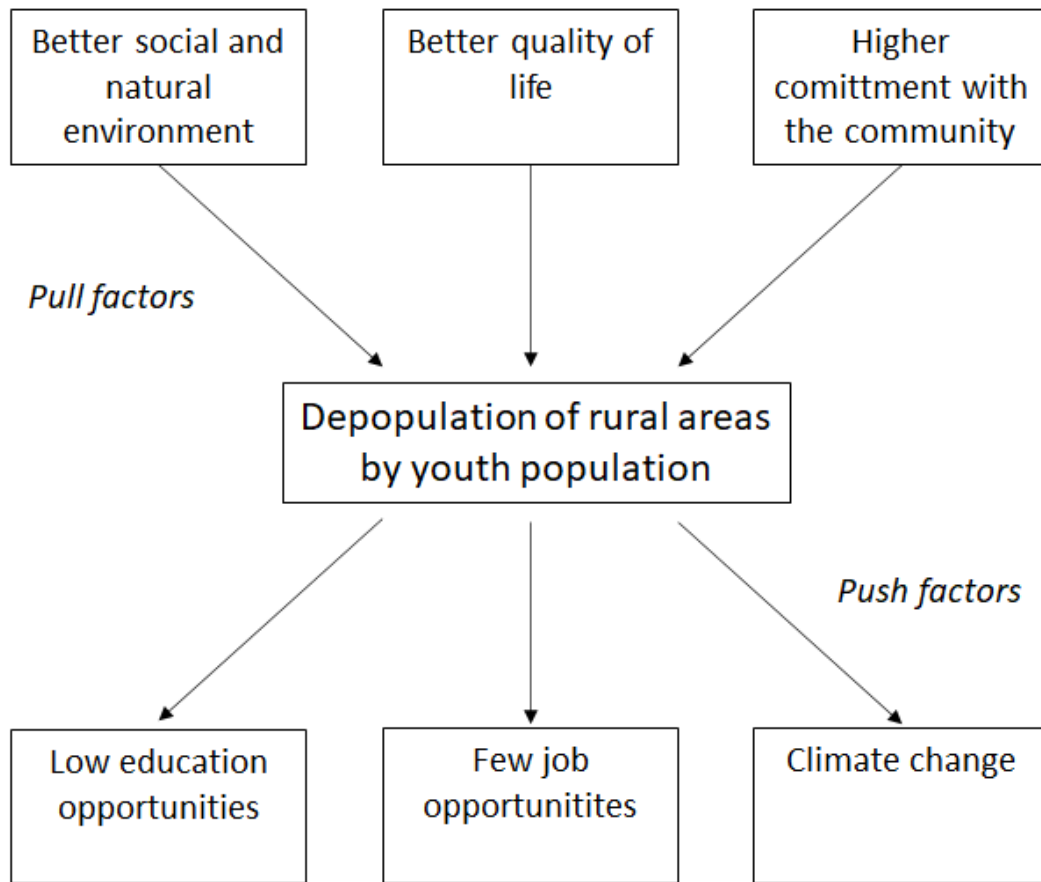

**Figure S2.** Sociodemographic data of our study, regional and national. **(a)** Age in our study, regional and national. Our study showed less heterogeneity than the regional and national levels. **(b)** Gender in our study, regional and national. The male gender predominates nationally and regionally. In contrast, our sample is homogeneous, with 50% of young people self-identifying with both genders. In the survey conducted, the option of "other gender" was presented, but this option did not obtain responses. On the other hand, the Census asks by sex and not by gender. **(c)** Educational level in our study, regionally and nationally. It corresponds to the last educational level reached by each young person. Since the young people are in the middle of their formal education, many studies in secondary school (26.7%) and higher education (25.6%). It is worth noting that 8.9% were primary school students, so they are not in any of these categories. In addition, a complete higher education level at the university level was not reached by any respondent. **(d)** Change in residence place in our study, regional and national. In the case of our study, we asked if they have lived outside their community. We used the Census data for the national and regional levels corresponding to the question "In which community or country did you live in April 2012? From these responses, we differentiated between young people who have changed their residence and those who have not.

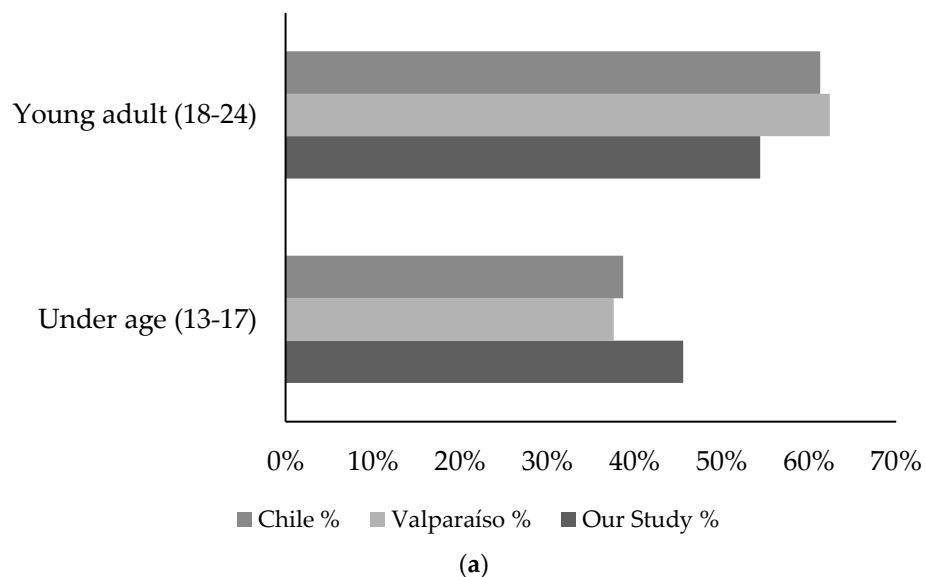

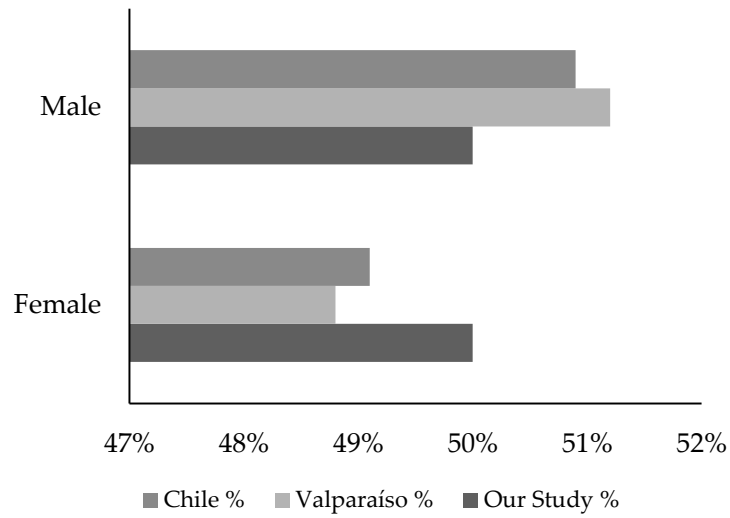

(b)

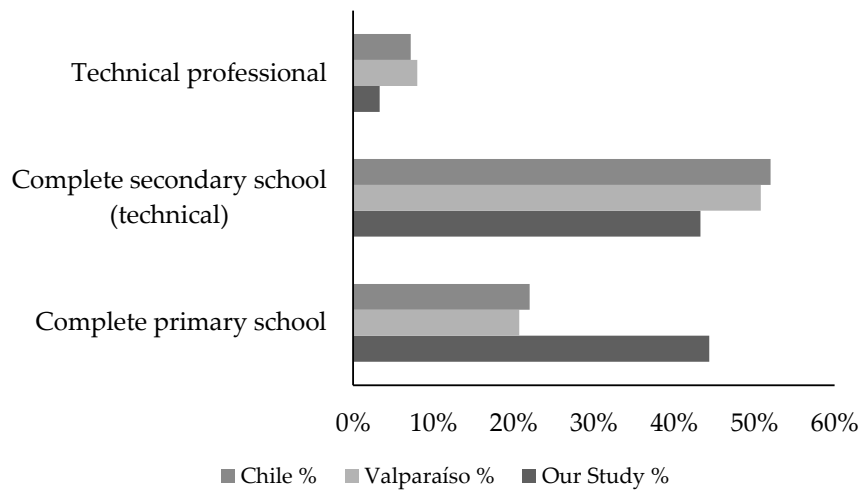

(c)

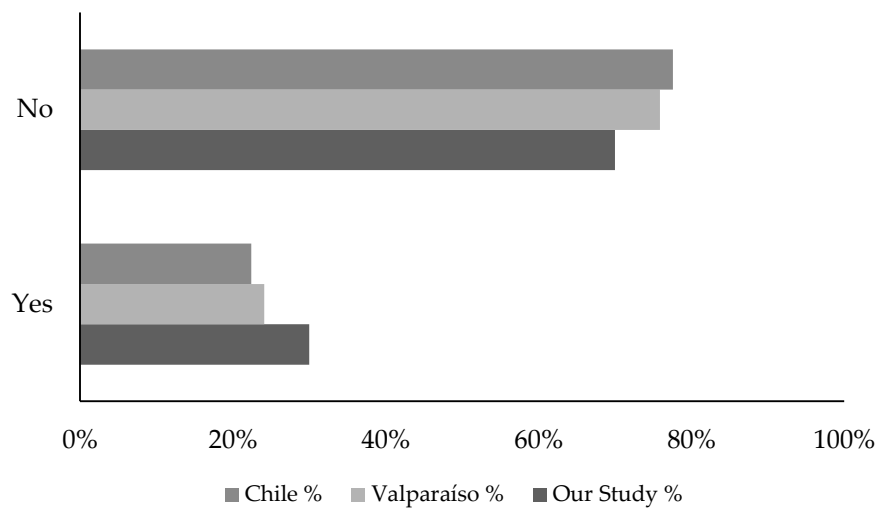

(d)
